# Supplementary material for: Effect of folate deficiency on promoter methylation and gene expression of Esr1, Cav1, and Elavl1, and its influence on spermatogenesis
Source: PubMed Central journal article supplement (PMC5421833; doi:10.18632/oncotarget.15731), 2017-02-25
Supplement: oncotarget-08-24130-s001.pdf [file oncotarget-08-24130-s001.pdf]

## Effect of folate deficiency on promoter methylation and gene expression of *Esr1*, *Cav1*, and *Elavl1*, and its influence on spermatogenesis

### Supplementary Material

**Supplemental Table S1:** Characteristics of 20 subjects for RT-PCR and BSP assay.

| Characteristic                      | Low folate (n= 10) <sup>a</sup> | High folate (n=10) <sup>a</sup> | P-value <sup>b</sup> |
|-------------------------------------|---------------------------------|---------------------------------|----------------------|
| Seminal plasma folate               | 15.83 (11.27—17.08)             | 43.07 (40.44—43.66)             | 0.00                 |
| Demographic                         |                                 |                                 |                      |
| Age (y)                             | 31 (25—39)                      | 31 (26—40)                      | 0.83                 |
| BMI (kg/m <sup>2</sup> )            | 21.6 (19.6—26.0)                | 22.1 (18.4—27.5)                | 0.77                 |
| Semen parameters                    |                                 |                                 |                      |
| Ejaculate volume (mL)               | 4.4 (2.5—6.0)                   | 3.4 (2.0—9.0)                   | 0.47                 |
| Sperm density (10 <sup>6</sup> /mL) | 55.87 (19.07—91.44)             | 182.11 (97.03—227.08)           | 0.00                 |
| Sperm count (x 10 <sup>6</sup> )    | 240.31 (61.01—394.40)           | 514.57 (279.63—1998.09)         | 0.02                 |
| Sperm progressive motility (%)      | 46.84 (32.39—65.37)             | 46.77 (35.98—64.13)             | 0.96                 |
| Sperm normal morphology (%)         | 43.84 (32.33—61.23)             | 46.34 (28.94—50.24)             | 0.81                 |
| Duration of abstinence (d)          | 5 (3—7)                         | 3 (2—7)                         | 0.15                 |

<sup>a</sup>All variables were given as median (range).

<sup>b</sup>independent student's t-test was used to determine the difference.

**Supplemental Table S2:** List of PCR primers

| Sample         | Gene           | Forward Primer       | Reverse Primer         | Length of Product (bp) |
|----------------|----------------|----------------------|------------------------|------------------------|
| Human sperm    | <i>Esr1</i>    | GCCAACGCGCAGGTCTA    | GCCGCAGCCTCAGA         | 62                     |
|                | <i>Cav1</i>    | GCGACCCTAACACCTCAAC  | ATGCCGTCAAAACCTGTGTGTC | 91                     |
|                | <i>Elavl1</i>  | TGAACTACGTGACCGGAAG  | CCCAAACCGAGAGAACATGTC  | 194                    |
|                | <i>β-actin</i> | GTCCACCGCAAATGCTTCTA | TGCTGTCACCTTCACCGTTC   | 190                    |
| Testis of mice | <i>Esr1</i>    | GTCGCCTAGCCCGCTGAT   | CATGTTTCCTTCTCGTTACTGC | 214                    |
|                | <i>Cav1</i>    | TAAATCACAGCCCAGGAAAC | TGAGATGCTGGGGTCGC      | 232                    |
|                | <i>Elavl1</i>  | AGGTTCCCTCCGAGCCCATC | GCGTCTTGCCCAAGTTGT     | 246                    |
|                | <i>β-actin</i> | CTGAGAGGAAATCGTGCGT  | CCACAGGATTCCATACCCAAGA | 208                    |

**Supplemental Table S3:** List of BSP primers

| Sample      | Gene          | Forward Primer            | Reverse Primer             | Length of Product (bp) |
|-------------|---------------|---------------------------|----------------------------|------------------------|
| Human sperm | <i>Esr1</i>   | AGATTAGTATTTAAAGTTGGAGGTT | ATATAAAAAATCATAATCATAATCC  | 283                    |
|             | <i>Cav1</i>   | TTTAAGAATTTTTTGTATTTTGG   | TATCCTAAAACCTCAATCTCACCTAC | 206                    |
|             | <i>Elavl1</i> | TTTGTGGATTTTTYGGGGGA      | ACGAACCRATATAAACRCCRA      | 164                    |
